# Supplementary material for: Physiology and role of irisin in glucose homeostasis
Source: Springer Nature journal article supplement (doi:10.1038/nrendo.2016.221), 2017-02-17
Supplement: 41574_2017_BFnrendo2016221_MOESM8_ESM.pdf [file 41574_2017_BFnrendo2016221_MOESM8_ESM.pdf]

**Supplementary Table 1:** Human studies investigating the association of irisin with obesity, insulin resistance, diabetes mellitus and metabolic syndrome

| Study             | Study groups                          | Study Type | Subject of study | Irisin levels associated with |              |          | N          | Irisin levels also associated with                                                                                                                                                        |
|-------------------|---------------------------------------|------------|------------------|-------------------------------|--------------|----------|------------|-------------------------------------------------------------------------------------------------------------------------------------------------------------------------------------------|
|                   |                                       |            |                  | Obesity (BMI)                 | IR (HOMA-IR) | Diabetes |            |                                                                                                                                                                                           |
| Schlogl (1)       | Healthy                               | CS         | Nutrition        | NR                            | NR           | NR       | 66         | Higher ad libitum 24 h energy intake associated with lower fasting irisin concentrations the following morning.<br>Fasting irisin concentrations not related to subsequent energy intake. |
| Ko (2)            | Healthy                               | CS         | Nutrition        | NR                            | NR           | NR       | 185        | Fruit consumption (positive)/ Meat consumption (negative)                                                                                                                                 |
| Anastasilakis (3) | Healthy                               | CS         | Nutrition        | No                            | No           | NR       | 36         | No association with standardized meal, caloric intake or diet quality                                                                                                                     |
| Loffler (4)       | Children and young adults             | CS         | Nutrition        | positive                      | NR           | NR       | 189        | No changes after meal or OGTT<br>Fat free mass, muscle mass and WHR (positive)                                                                                                            |
| Pekkala (5)       | Healthy                               | CS         | Exercise         | NR                            | NR           | NR       | 56         | No association with glucose tolerance                                                                                                                                                     |
| Crujeiras (6)     | Obese following diet vs normal weight | PC         | Obesity          | positive                      | NR           | NR       | 142        | Waist circumference, fat mass (positive)<br>Reduction in irisin levels after weight loss<br>Return to baseline irisin after regaining the lost weight                                     |
| Huh (7)           | Healthy vs obese                      | CS         | Obesity          | positive                      | NR           | NR       | 29/<br>117 | Muscle mass, glucose, ghrelin, IGF1 (positive)<br>Age, insulin, cholesterol, adiponectin (negative)<br>Irisin levels were reduced 6 months after bariatric surgery                        |
| Stengel (8)       | Anorectic vs normal vs obese          | CC         | Obesity          | positive                      | NR           | NR       | 40         | Fat mass, body cell mass, fat free mass, insulin (positive)                                                                                                                               |
| Pardo (9)         | Anorexic vs                           | CC         | Obesity          | positive                      | positive     | NR       | 145        | Irisin higher in obese vs anorexic or normal weight                                                                                                                                       |

|                       |                                                   |     |                               |                 |                             |    |     |                                                                                                                                                                            |
|-----------------------|---------------------------------------------------|-----|-------------------------------|-----------------|-----------------------------|----|-----|----------------------------------------------------------------------------------------------------------------------------------------------------------------------------|
|                       | normal vs obese                                   |     |                               |                 |                             |    |     | Fat mass, resting energy expenditure (positive)                                                                                                                            |
| Gutierrez-Repiso (10) | Morbidly obese vs nonobese                        | CC  | Obesity                       | <b>positive</b> | NR                          | NR | 45  | % change in waist to hip ratio after bariatric surgery (positive)                                                                                                          |
| Huerta (11)           | Overweight/obese women                            | RCT | Obesity                       | <b>positive</b> | <b>positive</b>             | NR | 73  | Glucose, insulin (positive).<br>No change in irisin levels during OGTT<br>Irisin reduction after weight loss                                                               |
| Li M (12)             | PCOS vs healthy                                   | CS  | PCOS                          | <b>positive</b> | <b>positive</b>             | NR | 301 | WHR, % FAT, TG, TC, LDLC, AUC Insulin, free androgen index (FAI) (positive)                                                                                                |
| Pukajlo (13)          | PCOS vs healthy                                   | CC  | PCOS                          | NR              | NR                          | NR | 301 | MetS in PCOS and in controls, body fat (positive)                                                                                                                          |
| Bostanci (14)         | PCOS vs. matched healthy                          | CC  | PCOS                          | <b>positive</b> | NR                          | NR | 70  | Higher in PCOS women compared to controls<br>Fasting insulin, total cholesterol (positive)                                                                                 |
| Bluher (15)           | Obese Children                                    | PC  | Obesity                       | NR              | NR                          | NR | 65  | Irisin increase after one year physical activity and diet                                                                                                                  |
| Polyzos (16)          | NAFL,NASH, obese, lean                            | CC  | Obesity<br>Liver              | <b>negative</b> | <b>No</b>                   | NR | 68  | Lower irisin in obese, or with NASH/NAFLD vs lean<br>No correlation with cardiometabolic risk factors                                                                      |
| Choi (17)             | NAFLD vs healthy                                  | CC  | Obesity<br>Liver              | <b>No</b>       | <b>positive</b>             | NR | 355 | Higher irisin levels in NAFLD compared with healthy<br>No association with obesity                                                                                         |
| Huth (18)             | Healthy trained /untrained, obese, obese with IGT | CC  | Obesity<br>insulin resistance | <b>positive</b> | <b>positive (M/I index)</b> | NR | 53  | Fat mass (positive)<br>Muscle citrate synthase, fitness (negative)                                                                                                         |
| Crujeiras (19)        | Obese after 8 week diet                           | PC  | Insulin resistance            | NR              | <b>positive</b>             | NR | 136 | Irisin levels paralleled body weight reduction after the dietary treatment (week 8) and returned to the baseline levels at 24 weeks in patients regaining the lost weight. |
| Sesti (20)            | White                                             | CS  | Insulin                       | <b>positive</b> | <b>positive</b>             | NR | 192 | Fasting and 2h post-load insulin (positive)                                                                                                                                |

|                    |                                                 |    |                     |                 |                                              |                 |      |                                                                                                                                                                                                                                                                                 |
|--------------------|-------------------------------------------------|----|---------------------|-----------------|----------------------------------------------|-----------------|------|---------------------------------------------------------------------------------------------------------------------------------------------------------------------------------------------------------------------------------------------------------------------------------|
|                    | nondiabetic adults                              |    | resistance          | <b>Fat mass</b> | <b>Matsuda index</b>                         |                 |      | Intima media thickness (positive)<br>Insulin stimulated glucose disposal, Matsuda index, insulin clearance (negative)                                                                                                                                                           |
| Reinehr (21)       | Obese, normal weight children                   | PC | Insulin resistance  | <b>No</b>       | <b>positive</b>                              | NR              | 60   | Irisin in obese/IFG > as in obese/NGT or normal weight<br>HDL, fasting glucose, 2h Glucose in OGTT (positive)                                                                                                                                                                   |
| Chen (22)          | Healthy, obese, obese with acanthosis nigricans | CC | Insulin resistance  | <b>positive</b> | <b>(positive)<br/>Higher fasting insulin</b> | NR              | 80   | Higher irisin in obese with acanthosis nigricans vs obese without acanthosis nigricans or healthy                                                                                                                                                                               |
| Qiu (23)           | Nondiabetic adults                              | MA | Insulin resistance  | NR              | <b>positive</b>                              | NR              | 1912 | The positive association between irisin and insulin resistance was small, but independent of BMI                                                                                                                                                                                |
| Norheim (24)       | Prediabetic vs healthy                          | PC | Obesity prediabetes | NR              | NR                                           | <b>positive</b> | 26   | Higher irisin level in prediabetes vs normal controls<br>No association of irisin with chronic exercise                                                                                                                                                                         |
| Sanchis-Gomar (25) | T2DM vs obese vs healthy                        | CS | Obesity prediabetes | <b>No</b>       | NR                                           | NR              | 153  | Similar irisin levels between morbidly obese patients with atherogenic dyslipidemia vs without, as well as between obese diabetic patients vs nonobese diabetics.<br>Urea, insulin in the nonobese diabetic group (negative)<br>Homocystein, HbA1c in obese diabetic (negative) |
| Kurdiova (25)      | T2DM, IGT, overweight/obese, healthy            | CS | prediabetes T2DM    | <b>No</b>       | <b>No Euglycemic hyperinsuline mic clamp</b> | <b>negative</b> | 99   | Lower irisin levels in T2DM subjects vs lean controls<br>Waist circumference, fasting glucose, AUC glycemic curve, visceral obesity (negative)                                                                                                                                  |
| Assyov (26)        | NGT, prediabetes, T2DM                          | CC | prediabetes T2DM    | <b>positive</b> | NR                                           | <b>negative</b> | 160  | Lower irisin levels in T2DM < Prediabetes < NGT<br>Fasting glucose, ALT, AST, GGT (negative)                                                                                                                                                                                    |

|                |                                                                       |    |                           |                       |                 |                 |     |                                                                                                                                                                                |
|----------------|-----------------------------------------------------------------------|----|---------------------------|-----------------------|-----------------|-----------------|-----|--------------------------------------------------------------------------------------------------------------------------------------------------------------------------------|
| Duran (27)     | T2DM vs IFG vs IGT vs NGT                                             | CS | prediabetes T2DM          | <b>negative</b>       | NR              | <b>negative</b> | 263 | Lower irisin in IFG, IGT or T2DM subjects vs NGT HDLC (positive) / postprandial glucose, LDLC, triglyceride (negative)                                                         |
| Liu (28)       | T2DM vs nondiabetic controls                                          | CS | T2DM                      | <b>positive NonDM</b> | NR              | <b>negative</b> | 156 | No association with metabolic phenotype in T2DM Total cholesterol, triglycerides, fasting glucose, diastolic pressure in nondiabetic controls (positive)                       |
| Yang (29)      | Healthy without T2DM but with 1 <sup>st</sup> degree relat. with T2DM | CS | T2DM                      | <b>No</b>             | <b>No</b>       | <b>No</b>       | 122 | No association with metabolic parameters in T2DM group HbA1c, eGFR, HOMA $\beta$ in NGT (positive)                                                                             |
| Xiang (30)     | Newly diagnos. T2DM, healthy                                          | CS | T2DM                      | NR                    | NR              | <b>negative</b> | 222 | Flow mediated dilatation( positive)                                                                                                                                            |
| Zhang (31)     | T2DM with vs without MVD vs healthy                                   | CS | T2DM                      | NR                    | NR              | <b>negative</b> | 94  | Irisin levels in T2DM with MVD < T2DM without MVD < healthy controls                                                                                                           |
| Wang (32)      | NGT vs T2DM                                                           | CS | T2DM                      | NR                    | <b>negative</b> | <b>negative</b> | 140 | No association with beta cell function related variables                                                                                                                       |
| Choi (33)      | NGT vs new onset T2DM                                                 | CS | T2DM                      | NR                    | NR              | <b>negative</b> | 208 | Reduced odds of newly diagnosed T2DM (positive) 2 h plasma glucose (negative)                                                                                                  |
| Al-Daghri (34) | T2DM vs controls                                                      | CS | T2DM                      | NR                    | NR              | <b>positive</b> | 164 | Frequency intensity time index (only in control group) (positive) DBP (overall), lean body mass (T2DM group) (negative)                                                        |
| Hu (35)        | T2DM with/ without retinopathy                                        | CC | T2DM diabetic retinopathy | NR                    | <b>negative</b> | <b>negative</b> | 240 | Lower irisin levels in T2DM group compared with control Fasting glucose, blood urea nitrogen, creatinine, age (negative) Creatinine clearance, ACE/ATII blocker use (positive) |

|                     |                                                                   |     |                  |                 |                   |                 |      |                                                                                                                                                                                                                 |
|---------------------|-------------------------------------------------------------------|-----|------------------|-----------------|-------------------|-----------------|------|-----------------------------------------------------------------------------------------------------------------------------------------------------------------------------------------------------------------|
| Liu (36)            | T2DM with wide range of renal function                            | CS  | T2DM nephropathy | <b>positive</b> | NR                | NR              | 365  | Higher irisin levels in T2DM with chronic kidney disease compared to T2DM without CKD.<br>Fat mass, % fat mass, eGFR (positive)<br>Age, pulse pressure (in T2DM patients with normal renal function) (negative) |
| Wang (37)           | T2DM vs healthy controls                                          | CS  | T2DM nephropathy | NR              | NR                | <b>negative</b> | 200  | Irisin in T2DM macroalbuminuria < microalbuminuria < normoalbuminuria.<br>2h blood glucose, urinary albumin excretion (negative)<br>Flow mediated dilation (positive)                                           |
| Zhang (38)          | Meta-Analysis                                                     | MA  | T2DM             | NR              | NR                | <b>negative</b> | 1110 | Lower irisin levels in T2DM compared to healthy                                                                                                                                                                 |
| Espes (39)          | T1DM, healthy                                                     | CS  | T1DM             | NR              | NR                | NR              | 70   | Higher in T1DM compared to healthy controls                                                                                                                                                                     |
| Lopez-Legarrea (40) | Excessive obese with MetS after diet                              | RCT | Obesity MetS     | <b>positive</b> | <b>(positive)</b> | NR              | 96   | Fat mass, carbohydrate intake (positive) / Circulating glucose (negative)<br>Higher irisin associated with greater reduction on glucose, insulin, HOMA-IR, triglycerides after diet.                            |
| Park (41)           | Caucasian, African Americans without history of MI, stroke, or DM | CS  | MetS             | <b>positive</b> | <b>positive</b>   |                 | 151  | Increased risk of MetS (positive)<br>Fasting blood glucose, high triglycerides, low HDL, SBP, DBP (positive)<br>Adiponectin (negative)                                                                          |
| Moreno (42)         | Active vs sedentary                                               | CC  | MetS             | <b>positive</b> | <b>positive</b>   | NR              | 428  | Fasting insulin, fasting triglycerides in sedentary individuals (positive)                                                                                                                                      |
| Hwang (43)          | Seoul Metro City Diabetes                                         | CS  | MetS             | <b>negative</b> | <b>negative</b>   | <b>negative</b> | 424  | Favorable metabolic income: less obese, lower blood pressure and glucose (positive)                                                                                                                             |

|                    |                                                                   |          |               |    |          |    |      |                                                                                                                                                                                                         |
|--------------------|-------------------------------------------------------------------|----------|---------------|----|----------|----|------|---------------------------------------------------------------------------------------------------------------------------------------------------------------------------------------------------------|
|                    | Prevention Pr.                                                    |          |               |    |          |    |      | Skeletal muscle mass (positive)                                                                                                                                                                         |
| Yan (44)           | Chinese with central obesity                                      | CS       | MetS          | No | No       | NR | 1115 | Reduced risk of metabolic syndrome, glucose (positive)<br>Fasting insulin, HbA1c, albumin/globulin ratio (negative)<br>No associations with blood pressure, triglycerides, HDL                          |
| Hirsch (45)        | Prader Willi vs healthy BMI matched                               | CC       | MetS          | NR | negative | NR | 51   | Salivary irisin was higher in Prader-Willi syndrome<br>Total cholesterol, LDL-Cholesterol, leptin, triglycerides in PWS (positive)<br>HDL-Cholesterol in Prader-Willi Syndrome (negative)               |
| Huh (46)           | MetS vs healthy                                                   | PC       | MetS exercise | NR | NR       | NR | 20   | Similar increase of irisin levels in subjects with vs without MetS after exercise                                                                                                                       |
| Aronis (47)        | Patient with ACS/ established coronary artery disease vs controls | CC<br>PC | CV            | NR | NR       | NR | 349  | No association between irisin levels and ACS<br>Major adverse cardiovascular events in patients with established coronary artery disease after PCI (positive)<br>Did not predict the development of ACS |
| Emanuele (48)      | Centenarians, young healthy, young with MI                        | CC       | CV            | NR | NR       | NR |      | Irisin in young patients with myocardial infarction < young healthy patients < centenarians                                                                                                             |
| Aydin (49)         | AMI, matched controls                                             | CC       | CV            | NR | NR       | NR | 25   | Troponin I, CKMB and CK in AMI- Irisin measured in saliva (positive)<br>Gradual decrease of saliva/serum irisin over 48h after AMI                                                                      |
| de la Iglesia (50) | Caucasian with MetS in an energy restricted                       | PC       | Lipid profile | NR | NR       | NR | 93   | Total cholesterol, LDL, Apolipoprotein B (positive)                                                                                                                                                     |

|                 |                                                             |    |                           |    |          |          |        |                                                                                                                                                                                         |
|-----------------|-------------------------------------------------------------|----|---------------------------|----|----------|----------|--------|-----------------------------------------------------------------------------------------------------------------------------------------------------------------------------------------|
|                 | programme                                                   |    |                           |    |          |          |        |                                                                                                                                                                                         |
| Panagiotou (51) | Overweight/obese with diabetes or two other CV risk factors | CS | Lipid profile             | NR | NR       | NR       | 39     | HDL, large HDL particles and omentin (negative)                                                                                                                                         |
| Wen (52)        | CKD vs healthy                                              | CC | Renal metabolic           | No | NR       | NR       | 57     | Blood urea nitrogen (negative)<br>HDL (positive)                                                                                                                                        |
| Brondani (53)   | T2DM vs Nondiabetic                                         | CC | SNPs                      | NR | NR       | NR       | 1440   | FNDC5 gene:<br>SNP rs3480: HbA1c levels in T2DM patients (positive)<br>SNP rs1746661: Increased systolic blood pressure, total cholesterol and LDL (positive)                           |
| Staiger (54)    | German families at increased risk for T2DM                  | CS | SNPs / Insulin resistance | NR | positive | NR       | 1976   | rs16835198 and rs726344 of <i>FNDC5</i> with measures of insulin sensitivity (positive)                                                                                                 |
| Ebert (55)      | General population                                          | CS | SNPs                      | NR | NR       | NR       | > 1000 | Fat mass, fasting glucose, dyslipidemia (negative)<br>Irisin decreased during OGTT in subjects with NGT, IFG, IGT or T2DM<br>No association of rs726344 <i>FNDC5</i> with irisin levels |
| Tanisawa (56)   | Japanese men                                                | CS | SNPs                      | NR | No       | NR       | 163    | No association of rs3480 and rs16835198 of <i>FNDC5</i> with circulating irisin                                                                                                         |
| Zhao (57)       | GDM, healthy                                                | CC | GDM                       | NR | NR       | negative | 122    | DBP, fasting blood glucose (negative)                                                                                                                                                   |
| Yuksel (58)     | GDM, pregnant                                               | CC | GDM                       | NR | NR       | negative | 40     | No association with maternal age, gestational week at birth, BMI at birth, birth weight, neonatal height, systolic and diastolic blood pressure.                                        |

|               |                                          |    |     |    |                 |                 |     |                                                                                                                                                           |
|---------------|------------------------------------------|----|-----|----|-----------------|-----------------|-----|-----------------------------------------------------------------------------------------------------------------------------------------------------------|
|               |                                          |    |     |    |                 |                 |     | BMI at birth, as well as with HOMA-IR (negative)                                                                                                          |
| Kuzmicki (59) | GDM, BMI-matched NGT                     | CC | GDM | NR | NR              | <b>negative</b> | 270 | Irisin levels increase in gestation, but this increase is lower in GDM compared to NGT controls.                                                          |
| Erol (60)     | GDM, pregnant                            | CC | GDM | NR | NR              | <b>negative</b> | 50  | Irisin levels lower in GDM vs controls in the first trimester                                                                                             |
| Ebert (61)    | GDM, pregnant                            | CC | GDM | NR | NR              | <b>No</b>       | 148 | Similar irisin levels between GDM and controls<br>Increased irisin after delivery in GDM compared to normal Fasting insulin during pregnancy (positive)   |
| Garces (62)   | Pregnant vs preeclamptic vs eumenorrheic | CC | GDM | NR | <b>positive</b> | <b>negative</b> | 70  | Irisin was lower in preeclamptic vs pregnant controls in the 3rd trimester of gestation.<br>HOMA IR in the first trimester of normal pregnancy (positive) |

(positive) positive association, (negative) negative association; CC, casecontrol study; CS, crosssectional study; PC, prospective cohort study; RCT, randomized controlled trial; (A)MI, (acute) myocardial infarction; CV, cardiovascular; DBP, diastolic blood pressure; MVD, macrovascular disease; NGT, normal glucose tolerance; IGT, impaired glucose tolerance; IFG, impaired fasting glucose; GDM, gestational diabetes mellitus; T1DM, type 1 diabetes mellitus; T2DM, type 2 diabetes mellitus; MetS, metabolic syndrome; SNPs, single nucleotide polymorphism

**References**

1. Schlogl M, Piaggi P, Votruba SB, Walter M, Krakoff J, Thearle MS. Increased 24-hour ad libitum food intake is associated with lower plasma irisin concentrations the following morning in adult humans. *Appetite*. 2015;90:154-9.
2. Ko BJ, Park KH, Shin S, Zaichenko L, Davis CR, Crowell JA, et al. Diet quality and diet patterns in relation to circulating cardiometabolic biomarkers. *Clin Nutr*. 2015.
3. Anastasilakis AD, Polyzos SA, Saridakis ZG, Kynigopoulos G, Skouvaklidou EC, Molyvas D, et al. Circulating irisin in healthy, young individuals: day-night rhythm, effects of food intake and exercise, and associations with gender, physical activity, diet, and body composition. *J Clin Endocrinol Metab*. 2014;99(9):3247-55.
4. Loffler D, Muller U, Scheuermann K, Friebe D, Gesing J, Bielitz J, et al. Serum irisin levels are regulated by acute strenuous exercise. *J Clin Endocrinol Metab*. 2015;100(4):1289-99.
5. Pekkala S, Wiklund PK, Hulmi JJ, Ahtiainen JP, Horttanainen M, Pollanen E, et al. Are skeletal muscle FNDC5 gene expression and irisin release regulated by exercise and related to health? *J Physiol*. 2013;591(21):5393-400.
6. Crujeiras AB, Zulet MA, Lopez-Legarrea P, de la Iglesia R, Pardo M, Carreira MC, et al. Association between circulating irisin levels and the promotion of insulin resistance during the weight maintenance period after a dietary weight-lowering program in obese patients. *Metabolism*. 2014;63(4):520-31.
7. Huh JY, Panagiotou G, Mougios V, Brinkoetter M, Vamvini MT, Schneider BE, et al. FNDC5 and irisin in humans: I. Predictors of circulating concentrations in serum and plasma and II. mRNA expression and circulating concentrations in response to weight loss and exercise. *Metabolism*. 2012;61(12):1725-38.
8. Stengel A, Hofmann T, Goebel-Stengel M, Elbelt U, Kobelt P, Klapp BF. Circulating levels of irisin in patients with anorexia nervosa and different stages of obesity--correlation with body mass index. *Peptides*. 2013;39:125-30.
9. Pardo M, Crujeiras AB, Amil M, Aguera Z, Jimenez-Murcia S, Banos R, et al. Association of irisin with fat mass, resting energy expenditure, and daily activity in conditions of extreme body mass index. *Int J Endocrinol*. 2014;2014:857270.
10. Gutierrez-Repiso C, Garcia-Serrano S, Rodriguez-Pacheco F, Garcia-Escobar E, Haro-Mora JJ, Garcia-Arnes J, et al. FNDC5 could be regulated by leptin in adipose tissue. *Eur J Clin Invest*. 2014;44(10):918-25.
11. Huerta AE, Prieto-Hontoria PL, Fernandez-Galilea M, Sainz N, Cuervo M, Martinez JA, et al. Circulating irisin and glucose metabolism in overweight/obese women: effects of alpha-lipoic acid and eicosapentaenoic acid. *J Physiol Biochem*. 2015;71(3):547-58.
12. Li M, Yang M, Zhou X, Fang X, Hu W, Zhu W, et al. Elevated circulating levels of irisin and the effect of metformin treatment in women with polycystic ovary syndrome. *J Clin Endocrinol Metab*. 2015;100(4):1485-93.
13. Pukajlo K, Laczanski L, Kolackov K, Kuliczowska-Plaksej J, Bolanowski M, Milewicz A, et al. Irisin plasma concentration in PCOS and healthy subjects is related to body fat content and android fat distribution. *Gynecol Endocrinol*. 2015;31(11):907-11.
14. Bostanci MS, Akdemir N, Cinemre B, Cevrioglu AS, Ozden S, Unal O. Serum irisin levels in patients with polycystic ovary syndrome. *Eur Rev Med Pharmacol Sci*. 2015;19(23):4462-8.
15. Bluhner S, Panagiotou G, Petroff D, Markert J, Wagner A, Klemm T, et al. Effects of a 1-year exercise and lifestyle intervention on irisin, adipokines, and inflammatory markers in obese children. *Obesity (Silver Spring)*. 2014;22(7):1701-8.
16. Polyzos SA, Kountouras J, Anastasilakis AD, Geladari EV, Mantzoros CS. Irisin in patients with nonalcoholic fatty liver disease. *Metabolism*. 2014;63(2):207-17.
17. Choi ES, Kim MK, Song MK, Kim JM, Kim ES, Chung WJ, et al. Association between serum irisin levels and non-alcoholic fatty liver disease in health screen examinees. *PLoS One*. 2014;9(10):e110680.

18. Huth C, Dubois MJ, Marette A, Tremblay A, Weisnagel SJ, Lacaille M, et al. Irisin is more strongly predicted by muscle oxidative potential than adiposity in non-diabetic men. *J Physiol Biochem.* 2015;71(3):559-68.
19. Crujeiras AB, Pardo M, Arturo RR, Navas-Carretero S, Zulet MA, Martinez JA, et al. Longitudinal variation of circulating irisin after an energy restriction-induced weight loss and following weight regain in obese men and women. *Am J Hum Biol.* 2014;26(2):198-207.
20. Sesti G, Andreozzi F, Fiorentino TV, Mannino GC, Sciacqua A, Marini MA, et al. High circulating irisin levels are associated with insulin resistance and vascular atherosclerosis in a cohort of nondiabetic adult subjects. *Acta Diabetol.* 2014;51(5):705-13.
21. Reinehr T, Elfers C, Lass N, Roth CL. Irisin and its relation to insulin resistance and puberty in obese children: a longitudinal analysis. *J Clin Endocrinol Metab.* 2015;100(5):2123-30.
22. Chen JQ, Fang LJ, Song KX, Wang XC, Huang YY, Chai SY, et al. Serum Irisin Level is Higher and Related with Insulin in Acanthosis Nigricans-related Obesity. *Exp Clin Endocrinol Diabetes.* 2015.
23. Qiu S, Cai X, Yin H, Zugel M, Sun Z, Steinacker JM, et al. Association between circulating irisin and insulin resistance in non-diabetic adults: A meta-analysis. *Metabolism.* 2016;65(6):825-34.
24. Norheim F, Langleite TM, Hjorth M, Holen T, Kielland A, Stadheim HK, et al. The effects of acute and chronic exercise on PGC-1alpha, irisin and browning of subcutaneous adipose tissue in humans. *FEBS J.* 2014;281(3):739-49.
25. Sanchis-Gomar F, Alis R, Pareja-Galeano H, Sola E, Victor VM, Rocha M, et al. Circulating irisin levels are not correlated with BMI, age, and other biological parameters in obese and diabetic patients. *Endocrine.* 2014;46(3):674-7.
26. Assyov Y, Gateva A, Tsakova A, Kamenov Z. Irisin in the Glucose Continuum. *Exp Clin Endocrinol Diabetes.* 2016;124(1):22-7.
27. Duran ID, Gulcelik NE, Unal M, Topcuoglu C, Sezer S, Tuna MM, et al. Irisin levels in the progression of diabetes in sedentary women. *Clin Biochem.* 2015;48(18):1268-72.
28. Liu JJ, Wong MD, Toy WC, Tan CS, Liu S, Ng XW, et al. Lower circulating irisin is associated with type 2 diabetes mellitus. *J Diabetes Complications.* 2013;27(4):365-9.
29. Yang M, Chen P, Jin H, Xie X, Gao T, Yang L, et al. Circulating levels of irisin in middle-aged first-degree relatives of type 2 diabetes mellitus - correlation with pancreatic beta-cell function. *Diabetol Metab Syndr.* 2014;6(1):133.
30. Xiang L, Xiang G, Yue L, Zhang J, Zhao L. Circulating irisin levels are positively associated with endothelium-dependent vasodilation in newly diagnosed type 2 diabetic patients without clinical angiopathy. *Atherosclerosis.* 2014;235(2):328-33.
31. Zhang M, Chen P, Chen S, Sun Q, Zeng QC, Chen JY, et al. The association of new inflammatory markers with type 2 diabetes mellitus and macrovascular complications: a preliminary study. *Eur Rev Med Pharmacol Sci.* 2014;18(11):1567-72.
32. Wang L, Song J, Wang C, Lin P, Liang K, Sun Y, et al. Circulating Levels of Betatrophin and Irisin Are Not Associated with Pancreatic beta-Cell Function in Previously Diagnosed Type 2 Diabetes Mellitus Patients. *J Diabetes Res.* 2016;2016:2616539.
33. Choi YK, Kim MK, Bae KH, Seo HA, Jeong JY, Lee WK, et al. Serum irisin levels in new-onset type 2 diabetes. *Diabetes Res Clin Pract.* 2013;100(1):96-101.
34. Al-Daghri NM, Alokail MS, Rahman S, Amer OE, Al-Attas OS, Alfawaz H, et al. Habitual physical activity is associated with circulating irisin in healthy controls but not in subjects with diabetes mellitus type 2. *Eur J Clin Invest.* 2015;45(8):775-81.
35. Hu W, Wang R, Li J, Zhang J, Wang W. Association of irisin concentrations with the presence of diabetic nephropathy and retinopathy. *Ann Clin Biochem.* 2016;53(Pt 1):67-74.
36. Liu JJ, Liu S, Wong MD, Tan CS, Tavintharan S, Sum CF, et al. Relationship between circulating irisin, renal function and body composition in type 2 diabetes. *J Diabetes Complications.* 2014;28(2):208-13.

37. Wang HH, Zhang XW, Chen WK, Huang QX, Chen QQ. Relationship between serum irisin levels and urinary albumin excretion in patients with type 2 diabetes. *J Diabetes Complications*. 2015;29(3):384-9.
38. Zhang C, Ding Z, Lv G, Li J, Zhou P, Zhang J. Lower irisin level in patients with type 2 diabetes mellitus: A case-control study and meta-analysis. *J Diabetes*. 2016;8(1):56-62.
39. Espes D, Lau J, Carlsson PO. Increased levels of irisin in people with long-standing Type 1 diabetes. *Diabet Med*. 2015;32(9):1172-6.
40. Lopez-Legarrea P, de la Iglesia R, Crujeiras AB, Pardo M, Casanueva FF, Zulet MA, et al. Higher baseline irisin concentrations are associated with greater reductions in glycemia and insulinemia after weight loss in obese subjects. *Nutr Diabetes*. 2014;4:e110.
41. Park KH, Zaichenko L, Brinkoetter M, Thakkar B, Sahin-Efe A, Joung KE, et al. Circulating irisin in relation to insulin resistance and the metabolic syndrome. *J Clin Endocrinol Metab*. 2013;98(12):4899-907.
42. Moreno M, Moreno-Navarrete JM, Serrano M, Ortega F, Delgado E, Sanchez-Ragnarsson C, et al. Circulating irisin levels are positively associated with metabolic risk factors in sedentary subjects. *PLoS One*. 2015;10(4):e0124100.
43. Hwang YC, Jeon WS, Park CY, Youn BS. The ratio of skeletal muscle mass to visceral fat area is a main determinant linking circulating irisin to metabolic phenotype. *Cardiovasc Diabetol*. 2016;15:9.
44. Yan B, Shi X, Zhang H, Pan L, Ma Z, Liu S, et al. Association of serum irisin with metabolic syndrome in obese Chinese adults. *PLoS One*. 2014;9(4):e94235.
45. Hirsch HJ, Gross I, Pollak Y, Eldar-Geva T, Gross-Tsur V. Irisin and the Metabolic Phenotype of Adults with Prader-Willi Syndrome. *PLoS One*. 2015;10(9):e0136864.
46. Huh JY, Siopi A, Mougios V, Park KH, Mantzoros CS. Irisin in response to exercise in humans with and without metabolic syndrome. *J Clin Endocrinol Metab*. 2015;100(3):E453-7.
47. Aronis KN, Moreno M, Polyzos SA, Moreno-Navarrete JM, Ricart W, Delgado E, et al. Circulating irisin levels and coronary heart disease: association with future acute coronary syndrome and major adverse cardiovascular events. *Int J Obes (Lond)*. 2015;39(1):156-61.
48. Emanuele E, Minoretta P, Pareja-Galeano H, Sanchis-Gomar F, Garatachea N, Lucia A. Serum irisin levels, precocious myocardial infarction, and healthy exceptional longevity. *Am J Med*. 2014;127(9):888-90.
49. Aydin S, Kobat MA, Kalayci M, Eren MN, Yilmaz M, Kuloglu T, et al. Decreased saliva/serum irisin concentrations in the acute myocardial infarction promising for being a new candidate biomarker for diagnosis of this pathology. *Peptides*. 2014;56:141-5.
50. de la Iglesia R, Lopez-Legarrea P, Crujeiras AB, Pardo M, Casanueva FF, Zulet MA, et al. Plasma irisin depletion under energy restriction is associated with improvements in lipid profile in metabolic syndrome patients. *Clin Endocrinol (Oxf)*. 2014;81(2):306-11.
51. Panagiotou G, Mu L, Na B, Mukamal KJ, Mantzoros CS. Circulating irisin, omentin-1, and lipoprotein subparticles in adults at higher cardiovascular risk. *Metabolism*. 2014;63(10):1265-71.
52. Wen MS, Wang CY, Lin SL, Hung KC. Decrease in irisin in patients with chronic kidney disease. *PLoS One*. 2013;8(5):e64025.
53. Brondani LA, Boelter G, Assmann TS, Leitao CB, Canani LH, Crispim D. Irisin-encoding gene (FNDC5) variant is associated with changes in blood pressure and lipid profile in type 2 diabetic women but not in men. *Metabolism*. 2015;64(9):952-7.
54. Staiger H, Bohm A, Scheler M, Berti L, Machann J, Schick F, et al. Common genetic variation in the human FNDC5 locus, encoding the novel muscle-derived 'browning' factor irisin, determines insulin sensitivity. *PLoS One*. 2013;8(4):e61903.
55. Ebert T, Kralisch S, Wurst U, Scholz M, Stumvoll M, Kovacs P, et al. Association of metabolic parameters and rs726344 in FNDC5 with serum irisin concentrations. *Int J Obes (Lond)*. 2016;40(2):260-5.

56. Tanisawa K, Taniguchi H, Sun X, Ito T, Cao ZB, Sakamoto S, et al. Common single nucleotide polymorphisms in the FNDC5 gene are associated with glucose metabolism but do not affect serum irisin levels in Japanese men with low fitness levels. *Metabolism*. 2014;63(4):574-83.
57. Zhao L, Li J, Li ZL, Yang J, Li ML, Wang GL. Circulating irisin is lower in gestational diabetes mellitus. *Endocr J*. 2015;62(10):921-6.
58. Yuksel MA, Oncul M, Tuten A, Imamoglu M, Acikgoz AS, Kucur M, et al. Maternal serum and fetal cord blood irisin levels in gestational diabetes mellitus. *Diabetes Res Clin Pract*. 2014;104(1):171-5.
59. Kuzmicki M, Telejko B, Lipinska D, Pliszka J, Szamatowicz M, Wilk J, et al. Serum irisin concentration in women with gestational diabetes. *Gynecol Endocrinol*. 2014;30(9):636-9.
60. Erol O, Erkal N, Ellidag HY, Isenlik BS, Aydin O, Derbent AU, et al. Irisin as an early marker for predicting gestational diabetes mellitus: a prospective study. *J Matern Fetal Neonatal Med*. 2016;29(22):3590-5.
61. Ebert T, Stepan H, Schrey S, Kralisch S, Hindricks J, Hopf L, et al. Serum levels of irisin in gestational diabetes mellitus during pregnancy and after delivery. *Cytokine*. 2014;65(2):153-8.
62. Garces MF, Peralta JJ, Ruiz-Linares CE, Lozano AR, Poveda NE, Torres-Sierra AL, et al. Irisin levels during pregnancy and changes associated with the development of preeclampsia. *J Clin Endocrinol Metab*. 2014;99(6):2113-9.
